# Supplementary material for: Circadian rhythm of activin A and related parameters of mineral metabolism in normal and uremic rats
Source: PubMed Central journal article supplement (PMC6614158; doi:10.1007/s00424-019-02291-2), 2019-06-24
Supplement: 424_2019_2291_MOESM1_ESM.pdf [file 424_2019_2291_MOESM1_ESM.pdf]

**Supplementary Table 1. Cosinor analyses of circadian rhythms**

|                   | Significance | r <sup>2</sup> | Acrophase | Mesor     | Amplitude | Figure |
|-------------------|--------------|----------------|-----------|-----------|-----------|--------|
| <b>Activin A:</b> |              |                |           |           |           |        |
| - Control         | p<0.01       | 0.29           | 22:00     | 252pg/ml  | 134pg/ml  | 1b     |
| - PNx LP          | ns           | -              | -         | -         | -         | 1c     |
| - PNx SP          | ns           | -              | -         | -         | -         | 1d     |
| - PNx HP          | ns           | -              | -         | -         | -         | 1e     |
| <b>FGF23:</b>     |              |                |           |           |           |        |
| - Control         | p<0.05       | 0.06           | 13:00     | 799pg/ml  | 66pg/ml   | 3b     |
| - PNx LP          | ns           | -              | -         | -         | -         | 3c     |
| - PNx SP          | ns           | -              | -         | -         | -         | 3d     |
| - PNx HP          | p<0.05       | 0.07           | 09:00     | 3481pg/ml | 568pg/ml  | 3e     |
| <b>PTH:</b>       |              |                |           |           |           |        |
| - Control         | p<0.0001     | 0.20           | 12:00     | 238pg/ml  | 147pg/ml  | 4b     |
| - PNx LP          | p<0.05       | 0.13           | 06:00     | 237pg/ml  | 165pg/ml  | 4c     |
| - PNx SP          | p<0.05       | 0.19           | 10:00     | 1885pg/ml | 698pg/ml  | 4d     |
| - PNx HP          | ns           | -              | -         | -         | -         | 4e     |
| <b>Phosphate:</b> |              |                |           |           |           |        |
| - Control         | p<0.0001     | 0.40           | 16:00     | 1.97mM    | 0.18mM    | 5b     |
| - PNx LP          | p<0.05       | 0.15           | 19:00     | 1.10mM    | 0.16mM    | 5c     |
| - PNx SP          | p=0.05       | 0.13           | 17:00     | 1.85mM    | 0.15mM    | 5d     |
| - PNx HP          | p<0.0001     | 0.13           | 00:00     | 2.70mM    | 0.25mM    | 5e     |
| <b>Klotho:</b>    |              |                |           |           |           |        |
| - Control         | ns           | -              | -         | -         | -         | 6c     |
| - PNx HP          | ns           | -              | -         | -         | -         | 6d     |

Cosinor analyses.

PNx: 5/6 partial nephrectomy. LP: Low phosphate diet. SP: Standard phosphate diet. HP: High phosphate diet.

Determination coefficient (r<sup>2</sup>), acrophase (rounded to nearest whole hour), Mesor (Midline Estimation Statistic of Rhythm), and amplitude are only presented in significant rhythms.

### **Circadian rhythm of activin A and related parameters of mineral metabolism in normal and uremic rats**

Pflügers Archiv – European Journal of Physiology

Anders Nordholm MD, Søren Egstrand MD, Eva Gravesen MD, PhD, Maria L. Mace MD, PhD, Marya Morevati PhD, Klaus Olgaard MD, DMSc, Ewa Lewin, MD, DMSc\*

\*Correspondence to:

Ewa Lewin, MD, dr.med.,  
ewa.lewin@regionh.dk

University of Copenhagen; Nephrological Department, Herlev Hospital, Herlev, Copenhagen, Denmark & Nephrological Department, Rigshospitalet, Copenhagen, Denmark
